# Supplementary material for: Antimicrobial Resistance Risk Assessment of Vibrio parahaemolyticus Isolated from Farmed Green Mussels in Singapore
Source: MDPI journal article supplement (doi:10.3390/microorganisms11061498), 2023-06-05
Supplement: s1 [file s1]

**Table S1 – Confirmation of antimicrobial resistance of *Vibrio parahaemolyticus* bacterial isolates via disc diffusion method from green mussels.**

|                                      | Treatment  |              |              |
|--------------------------------------|------------|--------------|--------------|
|                                      | Ampicillin | Penicillin G | Tetracycline |
| Bacterial isolates counts            | 98         | 105          | 94           |
| Resistant disc diffusion results (%) | 97 (98.9)  | 105 (100)    | 92 (97.8)    |

**Table S2 – Antimicrobial susceptibility profile of *V. parahaemolyticus* isolates via disc diffusion method isolated from green mussels.**

| Antibiotics                           | Intepretive Results (Farm Module) |                  |               | Intepretive Results (Retail Module) |                  |               |
|---------------------------------------|-----------------------------------|------------------|---------------|-------------------------------------|------------------|---------------|
|                                       | Sensitive (%)                     | Intermediate (%) | Resistant (%) | Sensitive(%)                        | Intermediate (%) | Resistant (%) |
| Ampicillin (10 µg)                    | 2 (3.1)                           | 17 (26.1)        | 46 (70.8)     | 9 (7.80)                            | 13 (11.2)        | 94 (81.0)     |
| Ampicillin/sulbactam (20 µg)          | 65 (100)                          | -                | -             | 100 (86.2)                          | 2 (1.70)         | 14 (12.1)     |
| Pencillin G (10 unit)                 | -                                 | -                | 65 (100)      | 4 (3.40)                            | -                | 112 (96.6)    |
| Tetracycline (30 µg)                  | 60 (92.3)                         | 2 (3.10)         | 3 (4.60)      | 95 (81.9)                           | 5 (4.30)         | 16 (13.8)     |
| Cefotaxime (30 µg)                    | 58 (89.2)                         | 7 (10.8)         | -             | 105 (90.5)                          | 11 (9.50)        | -             |
| Ciprofloxacin (5 µg)                  | 63 (96.9)                         | 2 (3.08)         | -             | 100 (86.2)                          | 16 (13.8)        | -             |
| Sulfamethoxazole/Trimethoprim (25 µg) | 65 (100)                          | -                | -             | 116 (100)                           | -                | -             |
| Chloramphenicol (30 µg)               | 65 (100)                          | -                | -             | 116 (100)                           | -                | -             |

Table S3 – Standard errors of occurrence and concentration data of haemolytic *V. parahaemolyticus* within the farm-to-home and retail-to-home chain scenarios in green mussels.

|                          |         |                   | Farm to home        |                 |                   |                   | Retail to home      |                 |                   |                   |
|--------------------------|---------|-------------------|---------------------|-----------------|-------------------|-------------------|---------------------|-----------------|-------------------|-------------------|
|                          |         |                   | Unsupplemented (SE) | Ampicillin (SE) | Penicillin G (SE) | Tetracycline (SE) | Unsupplemented (SE) | Ampicillin (SE) | Penicillin G (SE) | Tetracycline (SE) |
| Prevalence (Farm/Retail) |         |                   | 6.02E-05            | 5.45E-05        | 4.95E-05          | 3.48E-05          | 2.26E-05            | 4.21E-05        | 3.74E-05          | 3.47E-05          |
| Concentration (LogCFU/g) | Farm    | Pre-harvest       | 4.05E-04            | 4.36E-04        | 3.91E-04          | 2.53E-04          | N.A.                | N.A.            | N.A.              | N.A.              |
|                          |         | Post-harvest      | 4.24E-04            | 5.17E-04        | 4.55E-04          | 3.43E-04          | N.A.                | N.A.            | N.A.              | N.A.              |
|                          | Retail  | Retail-start      | 4.27E-04            | 5.21E-04        | 4.54E-04          | 3.45E-04          | 6.06E-04            | 4.10E-04        | 5.18E-04          | 3.30E-04          |
|                          |         | Retail-end        | 4.26E-04            | 5.21E-04        | 4.54E-04          | 3.45E-04          | 6.05E-04            | 4.09E-04        | 5.18E-04          | 3.30E-04          |
|                          | Home    | Home              | 4.24E-04            | 5.17E-04        | 4.52E-04          | 3.43E-04          | 5.98E-04            | 4.18E-04        | 5.22E-04          | 3.22E-04          |
|                          | Cooking | Average           | 7.15E-04            | 6.14E-04        | 6.21E-04          | 3.98E-04          | 6.73E-04            | 4.95E-04        | 4.92E-04          | 2.07E-04          |
|                          |         | Minimally cooked  | 7.68E-04            | 6.69E-04        | 6.32E-04          | 4.91E-04          | 7.47E-04            | 5.33E-04        | 6.65E-04          | 5.04E-04          |
|                          |         | Moderately cooked | 6.80E-04            | 8.46E-04        | 7.11E-04          | 5.75E-04          | 8.96E-04            | 5.61E-04        | 6.85E-04          | 2.06E-04          |
|                          |         | Highly cooked     | 1.86E-04            | 1.18E-04        | 1.51E-04          | 4.20E-06          | 4.30E-04            | 2.38E-04        | 9.59E-05          | 0                 |

Table S4 – Standard errors of risk estimates data across all scenarios in green mussels.

|                |                   | Farm to home                  |                              |                         | Retail to home                |                              |                         |
|----------------|-------------------|-------------------------------|------------------------------|-------------------------|-------------------------------|------------------------------|-------------------------|
|                |                   | P <sub>ill,serving</sub> (SE) | P <sub>ill,yearly</sub> (SE) | N <sub>cases</sub> (SE) | P <sub>ill,serving</sub> (SE) | P <sub>ill,yearly</sub> (SE) | N <sub>cases</sub> (SE) |
| Unsupplemented | Average           | 3.93E-05                      | 1.28E-04                     | 6.12E-01                | 6.07E-05                      | 1.56E-04                     | 7.45E-01                |
|                | Minimally cooked  | 1.92E-04                      | 3.20E-04                     | 1.53                    | 2.32E-04                      | 2.77E-04                     | 1.33                    |
|                | Moderately cooked | 2.09E-05                      | 2.81E-04                     | 1.34                    | 7.33E-05                      | 2.31E-04                     | 1.10                    |
|                | Highly cooked     | 1.03E-07                      | 2.45E-05                     | 1.17E-01                | 1.37E-06                      | 1.13E-04                     | 5.43E-01                |
| Ampicillin     | Average           | 2.41E-05                      | 1.40E-04                     | 6.72E-01                | 3.54E-05                      | 1.15E-04                     | 5.52E-01                |
|                | Minimally cooked  | 1.23E-04                      | 2.10E-04                     | 1.01                    | 1.09E-04                      | 2.84E-04                     | 1.36                    |
|                | Moderately cooked | 1.31E-05                      | 2.66E-04                     | 1.27                    | 2.95E-05                      | 2.10E-04                     | 1.01                    |
|                | Highly cooked     | 3.63E-08                      | 1.42E-05                     | 6.79E-02                | 1.70E-07                      | 3.80E-05                     | 1.82E-01                |
| Penicillin G   | Average           | 2.74E-05                      | 9.71E-05                     | 4.65E-01                | 2.92E-05                      | 1.14E-04                     | 5.44E-01                |
|                | Minimally cooked  | 8.19E-05                      | 2.26E-04                     | 1.08                    | 1.42E-04                      | 1.89E-04                     | 9.07E-01                |
|                | Moderately cooked | 1.55E-05                      | 2.02E-04                     | 9.65E-01                | 1.28E-05                      | 1.97E-04                     | 9.43E-01                |
|                | Highly cooked     | 7.38E-08                      | 2.11E-05                     | 1.01E-01                | 4.38E-08                      | 1.55E-05                     | 7.41E-02                |
| Tetracycline   | Average           | 6.35E-06                      | 8.81E-05                     | 4.22E-01                | 1.10E-06                      | 3.88E-05                     | 1.86E-01                |
|                | Minimally cooked  | 3.47E-05                      | 2.44E-04                     | 1.17                    | 5.78E-06                      | 2.40E-04                     | 1.15                    |
|                | Moderately cooked | 1.18E-06                      | 1.23E-04                     | 5.88E-01                | 7.91E-08                      | 3.05E-05                     | 1.46E-01                |
|                | Highly cooked     | 8.14E-10                      | 5.74E-07                     | 2.75E-03                | 0                             | 0                            | 0                       |
